# Supplementary material for: iPSC-Derived Glioblastoma Cells Have Enhanced Stemness Wnt/β-Catenin Activity Which Is Negatively Regulated by Wnt Antagonist sFRP4
Source: MDPI journal article supplement (doi:10.3390/cancers15143622), 2023-07-14
Supplement: s1 [file s1]

## Supplementary Information

### Supplementary Tables

**Table S1: List of chemicals**

| Chemicals                                                     | Catalogue                | Company                                               |
|---------------------------------------------------------------|--------------------------|-------------------------------------------------------|
| DMEM                                                          | Cat#110995065            | Gibco™, Thermo Fisher Scientific, US                  |
| FBS                                                           | Cat#10270106             | Gibco™, Thermo Fisher Scientific, US                  |
| Antibiotic solution                                           | Cat#A001                 | Himedia Laboratories Pvt. Ltd, Bangalore, India       |
| pCXLE-hOCT3/4-shp53-F<br>pCXLE-Hsk<br>pCXLE-hUL               | Cat# 27077, 27078, 27080 | Addgene, Watertown, Massachusetts, United States (US) |
| Lipofectamine™3000                                            | Cat# L3000008            | Invitrogen, Waltham, Massachusetts, US                |
| Knockout™ DMEM 1X, optimised for ES cells                     | Cat#10-829-018           | Gibco™, Thermo Fisher Scientific, US                  |
| Knockout™ Serum replacement                                   | Cat#10828028             | Gibco™, Thermo Fisher Scientific, US                  |
| GlutaMAX™ supplement                                          | Cat#35-050-061           | Gibco™, Thermo Fisher Scientific, US                  |
| NEAA                                                          | Cat#11140050             | Gibco™, Thermo Fisher Scientific, US                  |
| 2-mercaptoethanol                                             | Cat#M3148                | Sigma-Aldrich, St. Louis, Missouri, US                |
| FGF2 protein, human recombinant                               | Cat#10014-HNAE           | Sino Biological, China                                |
| Matrigel                                                      | Cat# 356230              | Corning, New York, US                                 |
| DMEM/F-12                                                     | Cat#11320033             | Gibco™, Thermo Fisher Scientific, US                  |
| Alkaline Phosphatase Live Stain                               | Cat#A14353               | Invitrogen, Waltham, Massachusetts, US                |
| RNAiso Plus                                                   | Cat# 9108                | TaKaRa Bio INC, Shiga, Japan                          |
| PrimeScript 1st strand cDNA synthesis kit                     | Cat# 6110A               | TaKaRa Bio INC, Shiga, Japan                          |
| TB Green® Premix Ex Taq™ II                                   | Cat# RR820A              | TaKaRa Bio INC, Shiga, Japan                          |
| Hoechst 33342, Trihydrochloride, Trihydrate solution in water | Cat# H3570               | Thermo Fisher Scientific, Waltham, Massachusetts, US  |
| DAPI                                                          | Cat#PCT1539              | Himedia Laboratories Pvt. Ltd, Bangalore, India       |
| SB431542 hydrate                                              | Cat#S4317                | Sigma-Aldrich, St. Louis, Missouri, US                |
| N-2 supplement(100X)                                          | Cat#17502048             | Gibco™, Thermo Fisher Scientific, US                  |

|                                                                           |                     |                                                 |
|---------------------------------------------------------------------------|---------------------|-------------------------------------------------|
| B-27™ Supplement (50X), serum free                                        | Cat#17504044        | Gibco™, Thermo Fisher Scientific, US            |
| RPMI 1640, 1X                                                             | Cat#A1049101        | Himedia Laboratories Pvt. Ltd, Bangalore, India |
| IWR-1                                                                     | Cat#I0161           | Sigma-Aldrich, St. Louis, MO, US                |
| Ascorbic Acid                                                             | Cat# 23006(0149100) | SRL Research Laboratories Pvt.Ltd., India       |
| Insulin solution from bovine pancreases                                   | Cat#I0516           | Sigma-Aldrich, St. Louis, MO, US                |
| ITS liquid media supplement                                               | Cat#I3146           | Sigma-Aldrich, St. Louis, MO, US                |
| Wnt 3a human                                                              | Cat#CYT-861         | Prospec Bio, Rehovot, Israel                    |
| CHIR99021                                                                 | Cat#SML1046         | Sigma-Aldrich, St. Louis, MO, US                |
| Activin A                                                                 | Cat#A4941           | Sigma-Aldrich, St. Louis, MO, US                |
| Nicotinamide                                                              | Cat#N0636           | Sigma-Aldrich, St. Louis, MO, US                |
| Retinoic Acid                                                             | Cat#R2625           | Sigma-Aldrich, St. Louis, MO, US                |
| EGF                                                                       | Cat#01-107          | Millipore, Burlington, Massachusetts, US        |
| DTZ                                                                       | Cat#43820           | Sigma-Aldrich, St. Louis, MO, US                |
| PFA                                                                       | Cat#TC703           | Himedia Laboratories Pvt. Ltd, Bangalore, India |
| PBS                                                                       | Cat#P4417           | Sigma-Aldrich, St. Louis, MO, US                |
| BSA                                                                       | Cat#MB083           | Himedia Laboratories Pvt. Ltd, Bangalore, India |
| RIPA Buffer                                                               | Cat#R0278           | Sigma-Aldrich, St. Louis, MO, US                |
| Phenylmethanesulfonylfluoride                                             | Cat#P7626           | Sigma-Aldrich, St. Louis, MO, US                |
| 3,3',5,5'-Tetramethylbenzidine (TMB)Liquid Substrate system for Membranes | Cat#T0565           | Sigma-Aldrich, St. Louis, MO, US                |
| Complete EDTA-free Protease Inhibitor Cocktail                            | Cat#4693132001      | Roche, Basel, Switzerland                       |
| Recombinant Human sFRP-4 Protein                                          | Cat#1827-SF-025/CF  | R & D Systems, Inc., Minneapolis, MN 55413, USA |

**Table S2: List of antibodies**

| <b>Antibody</b>                                                                       | <b>Catalogue</b>  | <b>Company</b>                                                     |
|---------------------------------------------------------------------------------------|-------------------|--------------------------------------------------------------------|
| Mouse anti-Oct-4 antibody                                                             | Cat# MAB4305      | Sigma-Aldrich, St. Louis, Missouri, US                             |
| Purified mouse anti-Sox2 antibody clone 030-678                                       | Cat# 561469       | BD Biosciences, US                                                 |
| Mouse anti-Stage-Specific Embryonic Antigen-4 (SSEA-4) antibody, clone MC-813-70      | Cat# MAB4304      | Sigma-Aldrich, St. Louis, Missouri, US                             |
| Purified mouse anti-human TRA-1-60 antigen                                            | Cat# 560071       | BD Pharmingen™, US                                                 |
| Mouse anti-TRA-1-81                                                                   | Cat#MAB4381       | Sigma-Aldrich, St. Louis, Missouri, US                             |
| Rabbit anti-Vimentin                                                                  | Cat# CUSABPAA4450 | Cusabio Technology LLC, Houston, Texas                             |
| Rabbit anti- Paired Box Gene 6 (PAX6)                                                 | Cat# PAH446Ra01   | Cloud-Clone Corp., Houston, US                                     |
| Rabbit anti-Nkx2.5 polyclonal antibody                                                | Cat#PA5-49431     | Thermo Fisher Scientific, Waltham, Massachusetts, US               |
| Mouse CD133 monoclonal antibody FITC, Clone: EMK08                                    | Cat#11-133-942    | eBioscience™, Thermo Fisher Scientific, Waltham, Massachusetts, US |
| Mouse CD44 monoclonal antibody (IM7), FITC,                                           | Cat#11-0441-82    | eBioscience™, Invitrogen, Waltham, Massachusetts, US               |
| Rabbit $\beta$ -catenin polyclonal antibody                                           | Cat#PA5-16762     | Thermo Fisher Scientific, Waltham, Massachusetts, US               |
| Goat anti-mouse IgG (H+L) highly cross-adsorbed secondary antibody, Alexa Fluor™ 594  | Cat# A-11032      | Invitrogen, Waltham, Massachusetts, US                             |
| Goat anti-rabbit IgG (H+L) highly cross-adsorbed secondary antibody, Alexa Fluor™ 488 | Cat#A32731        | Invitrogen, Waltham, Massachusetts, US                             |
| Goat anti-rabbit IgG(H+L) cross-adsorbed secondary antibody, Alexa Fluor™ 594         | Cat# A-11012      | Thermo Fisher Scientific, Waltham, Massachusetts, US               |
| FITC Rat IgG 2b, $\kappa$ isotype control antibody                                    | Cat#400633        | BioLegend, San Diego, CA, US                                       |
| Rabbit sFRP4 polyclonal antibody                                                      | Cat#15328-1-AP    | Proteintech Group, USA                                             |
| Goat anti-Rabbit IgG(H+L) Secondary Antibody,HRP                                      | Cat#32460         | Thermo Fisher Scientific, Waltham, Massachusetts, US               |
